# Supplementary material for: Tools for Edible Cities: A Review of Tools for Planning and Assessing Edible Nature-Based Solutions
Source: Preprints.org preprint supplement (doi:10.20944/preprints202105.0747.v1), 2021-05-31
Supplement: Supplementary file 1 [file supplementary]

## Appendix 2 - Model based Tools

**Table 1 Short description of the tools**

| Tool's name                                               | Description of the tool                                                                                                                                                                                                                                                                                                                                                                                                                                                                                                                                                                                                                      |
|-----------------------------------------------------------|----------------------------------------------------------------------------------------------------------------------------------------------------------------------------------------------------------------------------------------------------------------------------------------------------------------------------------------------------------------------------------------------------------------------------------------------------------------------------------------------------------------------------------------------------------------------------------------------------------------------------------------------|
| Farming Concrete: Toolkit: Data registrator (incl. yield) | The data collection tool of 437 community gardens in different formats with their totals calculated. The Toolkit includes a total of 18 methods organized into five categories: food production data, environmental data, social data, health data and economic data. There is no direct indicator estimation but only a good dataset to estimate them.<br><a href="https://farmingconcrete.org/">https://farmingconcrete.org/</a>                                                                                                                                                                                                           |
| Parcel tool (a web application)                           | Evaluation of the agricultural land needed for local food self-sufficiency for a given territory, as well as of the agricultural jobs created and the ecological impacts associated with possible changes in agricultural production methods and/or diets (e.g. greenhouse gas emissions, pollution of water resources, effects on biodiversity, etc.).The tool offers the estimation of the effects of certain changes in our diet, e.g. proximity between production agriculture and food consumption, modes of production, composition of our diets and food, etc.<br><a href="http://www.parcel-app.org/">http://www.parcel-app.org/</a> |
| UnaLab - NBS Simulation Visualization Tool                | to visualize and discuss the potential direct and indirect environmental, social and economic impacts of user-defined nature-based solutions (NBS) for urban global change adaptation.<br><a href="http://unalab.eng.it/NbsSvt/">http://unalab.eng.it/NbsSvt/</a>                                                                                                                                                                                                                                                                                                                                                                            |
| farmAR app                                                | farmAR app brings information about soil and crops health directly to the smartphone. A user can design a farm by drawing a polygon on the map. Additionally, the vegetation health map is provided.<br><a href="http://farmar.create4d.com/">http://farmar.create4d.com/</a>                                                                                                                                                                                                                                                                                                                                                                |
| Geofood                                                   | Estimation of geothermal heat potential for agricultural production. This tool is not public and used for designing aquaponic systems using a circular approach (water and nutrient recycling and energy recovery)<br><a href="https://geofoodproject.eu/">https://geofoodproject.eu/</a>                                                                                                                                                                                                                                                                                                                                                    |
| Urban GreenUP NBS Selection tool                          | The tool recommends NBS for a city, based on challenges and the capabilities of an organisation. It can be used to support the identification of the best NBS to tackle environmental problems and to become more resilient to climate change.<br><a href="https://www.urbangreenup.eu/resources/nbs-selection-tool/nbs-selection-tool.kl">https://www.urbangreenup.eu/resources/nbs-selection-tool/nbs-selection-tool.kl</a>                                                                                                                                                                                                                |

**Table 2 Data items managed by the tools (output data, input and external datasets)**

| Tool's name                             | farmAR app                                                 | UNaLab - NBS Simulation Visualization Tool | Urban GreenUP NBS Selection tool | GeoFood - Showcases and innovative concepts | Parcel tool (A web application)                                        | Farming Concrete - Toolkit: Data registrator (incl. yield) |
|-----------------------------------------|------------------------------------------------------------|--------------------------------------------|----------------------------------|---------------------------------------------|------------------------------------------------------------------------|------------------------------------------------------------|
|                                         | <i>Ex-post</i>                                             | <i>Ex-ante</i>                             | <i>Ex-ante</i>                   | <i>Ex-ante</i>                              | <i>Ex-ante</i>                                                         | <i>Ex-post</i>                                             |
| Yield                                   |                                                            |                                            |                                  |                                             |                                                                        | kg harvested/nb of plants by date                          |
| Irrigation need                         |                                                            |                                            |                                  |                                             | 0                                                                      |                                                            |
| Cultivated area                         |                                                            |                                            |                                  |                                             | ha (area necessary) for organic or conventional agriculture            | m2                                                         |
| Vegetation health                       | vegetation health distribution index (color maps)          |                                            |                                  |                                             |                                                                        |                                                            |
| Soil moisture                           | volume of water per total volume of soil (10cm soil depth) |                                            |                                  |                                             |                                                                        |                                                            |
| jobs created                            |                                                            |                                            |                                  |                                             | Full Equivalent jobs based on employments coef. by ha by type of crops |                                                            |
| Water use and water pollution variation |                                                            |                                            |                                  |                                             | % /ha                                                                  |                                                            |
| Biodiversity variation                  |                                                            |                                            |                                  |                                             | % of species /ha                                                       |                                                            |
| Impact on air and climate               |                                                            |                                            |                                  |                                             | CO2 emissions/ha (positive or negative)                                |                                                            |
| Soil impact variation of soil footprint |                                                            |                                            |                                  |                                             | %/pers. fed                                                            |                                                            |
| Soil impact variation of soil fertility |                                                            |                                            |                                  |                                             | %/ha                                                                   |                                                            |

| Tool's name                                | farmAR app | UNaLab - NBS Simulation Visualization Tool      | Urban GreenUP NBS Selection tool                      | GeoFood - Showcases and innovative concepts | Parcel tool (A web application) | Farming Concrete - Toolkit: Data registrator (incl. yield)                                                                   |
|--------------------------------------------|------------|-------------------------------------------------|-------------------------------------------------------|---------------------------------------------|---------------------------------|------------------------------------------------------------------------------------------------------------------------------|
| <i>urban heat</i>                          |            | °C Temp difference with baseline scenario + map |                                                       |                                             |                                 |                                                                                                                              |
| <i>air quality</i>                         |            | 1                                               |                                                       |                                             |                                 |                                                                                                                              |
| <i>flooding</i>                            |            | 1                                               |                                                       |                                             |                                 |                                                                                                                              |
| <i>gentrification</i>                      |            | 1                                               |                                                       |                                             |                                 |                                                                                                                              |
| <i>NBS properness score</i>                |            |                                                 | Score calculated along 8 success factors <sup>1</sup> |                                             |                                 |                                                                                                                              |
| number of plants produced                  |            |                                                 |                                                       |                                             |                                 | m2 by crops or number of plants by m2                                                                                        |
| Geothermal energy requirement              |            |                                                 |                                                       | kWh/m3 by type of aquaculture               |                                 |                                                                                                                              |
| Social inclusion - Community participation |            |                                                 |                                                       |                                             |                                 | nb of hours spent by volunteers by period of time<br>Nb of hours spent by task (composting, watering, ...) by period of time |
| Social inclusion - Training activities     |            |                                                 |                                                       |                                             |                                 | nb of events organised by year, number of participants by event                                                              |
| Organisational benefits                    |            |                                                 |                                                       |                                             |                                 |                                                                                                                              |
| Landfill waste produced                    |            |                                                 |                                                       |                                             |                                 | m3 and kg by type of waste (grass, dried leaves, ...) by date                                                                |
| Compost produced and used                  |            |                                                 |                                                       |                                             |                                 | kg and litres by period (measured with a bucket)                                                                             |

<sup>1</sup> Stable executive and political support ; Suitable internal processes/standards/regulations/policy ; Staff have time and motivation ; Advanced community engagement skills ; Alignment of internal departments ; Culture of innovation and risk tolerance ; Supportive departments in other level of government ; Access to suitable technical skills

| Tool's name                                    | farmAR app                                                                                                                                                                                         | UNaLab - NBS Simulation Visualization Tool                                                                                                                                     | Urban GreenUP NBS Selection tool                                                       | GeoFood - Showcases and innovative concepts | Parcel tool (A web application)                                                                                                                                                                                                                                        | Farming Concrete - Toolkit: Data registrator (incl. yield)                                                |
|------------------------------------------------|----------------------------------------------------------------------------------------------------------------------------------------------------------------------------------------------------|--------------------------------------------------------------------------------------------------------------------------------------------------------------------------------|----------------------------------------------------------------------------------------|---------------------------------------------|------------------------------------------------------------------------------------------------------------------------------------------------------------------------------------------------------------------------------------------------------------------------|-----------------------------------------------------------------------------------------------------------|
| Rainwater harvested                            |                                                                                                                                                                                                    |                                                                                                                                                                                |                                                                                        |                                             |                                                                                                                                                                                                                                                                        | rain water collector area (m2) by date (period) plus rainfall data (insitu or external) m3 by period      |
| Health impact: change in visitors feeling/mood |                                                                                                                                                                                                    |                                                                                                                                                                                |                                                                                        |                                             |                                                                                                                                                                                                                                                                        | % of visitor's mood value (10 - from Happy to frustrated) over a period visitors survey in/out the garden |
| market sales                                   |                                                                                                                                                                                                    |                                                                                                                                                                                |                                                                                        |                                             |                                                                                                                                                                                                                                                                        | Revenues generated by products sales over a period                                                        |
| Food donated                                   |                                                                                                                                                                                                    |                                                                                                                                                                                |                                                                                        |                                             |                                                                                                                                                                                                                                                                        | kg by type of product over a period                                                                       |
| External datasets                              | up-to date Satellite (Copernicus) data observations                                                                                                                                                | Models: urban heat and air quality (WRF-CHEM)<br>Flooding & water quality (InfoWorks, Mike Urban/flood)<br>Biodiv (InVEST, iTREE)<br>spraw, gentrification, real estate (SULD) | Catalogue of NBS. Calculation method integrated in an Excel file                       |                                             | average consumption by 61 typical products in kg/pers./year<br>water footprint of crops                                                                                                                                                                                | None                                                                                                      |
| Input data                                     | Login with an email and create a farm (outlining in a map), then satellite observations (GEO tags) will be visualised; for creating own GEO tags, picture and notes (lat-long, altitude automatic) | Choice of NBS, local datasets (landuse, emissions, air&water quality, biodiversity, demography, socio-economic and climate.                                                    | Urban challenges to address; NBS already considered; organization capacity information |                                             | 1. The concerned territory (commune, department...)<br>2. Population (number, composition, ...)<br>3. Percentage of the relocated food (local production)<br>4. Population diet<br>5. Percentage of organic matter that conditions the yield used for the calculations | Data collected by local communities into Concrete farming online DB                                       |
