# Supplementary material for: Tools for Edible Cities: A Review of Tools for Planning and Assessing Edible Nature-Based Solutions
Source: Preprints.org preprint supplement (doi:10.20944/preprints202105.0747.v1), 2021-05-31
Supplement: Supplementary file 2 [file supplementary]

Archive with 2 entries (2 files):
- Appendix2_ModelBasedTools.pdf
- Appendix1-ToolsReviewDB.xlsx
