# Supplementary material for: Tools for Edible Cities: A Review of Tools for Planning and Assessing Edible Nature-Based Solutions
Source: Preprints.org preprint supplement (doi:10.20944/preprints202105.0747.v1), 2021-05-31
Supplement: Supplementary file 2 [file supplementary › Appendix1-ToolsReviewDB.xlsx]

## Sheet: Tools Characterisation
		(a row for each tool)				Tool typology				Addressing NBS contributions to policies and regulations							Phase of the project where the tool is used									In case you used any ICT tool, was it:				Which dimensions of sustainability are addressed by the tool?			Is the tool used for stakeholder's involvement?	At which level stakeholders are involved due to the tool?						Tool DATA			Additionnal information	Interest for EdiCitNet	Reason of interest
Project Acronym	Project Title	Name of the tool	Website	Brief description of the tool	Contact person	Mathematical models for the purpose of measuring indicators of performance	Software applications for collecting, storing, processing and disseminating data/information	Decision support system in the form of process/design/operations/management/consumption improvement	Others (specify)	YES						NO	Planning	Designing	Operation and maintenance of the process performance	Monitoring of the process performance	Data treatment	Assessment	Result dissemination	Stakeholder engagement	Other (please specify)	Purchased	Free open source	Self developed	Other (please specify)	Social	Economic	Environmental		Inform	Consult	Involve	Collaborate	Training	Others (specify)	Is the tool and its data available?	If so, where it can be consulted?	Indicators used
										Level				Nature
										Local/regional	National	EU	International	Qualitative	Quantitative
CONNECTING Nature	COproductioN with NaturE for City Transitioning, INnovation and Governance	Connecting Nature Enterprise Platform	https://connectingnature.eu/ https://www.naturebasedenterprise.eu/	Platform to identify enterprises providing services related to NBS inlcuding urban farming	alorenzo@bioazul.com marcus.collier@tcd.ie adina.dumitru@udc.es ricardo.garcia.mira@udc.es mg.gomez@coruna.es ap.cribeiro@coruna.es				Geospatial ICT-support, Online toolkit with NBS, Oppla market place	1		1			1	0	0	0	0	0	0	0	0	0	0		1	1		1	1	1		0	0	0	0	0	0	0				Maybe
EdiCitNet	Edible Cities Network Integrating Edible City Solutions for social resilient and sustainably productive cities	The edible game	https://www.edicitnet.com/fr/	A serious game to plan edible NBS in the city		0	1	1	0	1	0	0	0	1	1	0	1	0	0	0	0	1	0	1	0	1	0	0	0	1	1	1	1	1	1	1	1	0	0	0				yes	Identify projects fitting the interests of the user of EdiCitNet tools
EdiCitNet	Edible Cities Network Integrating Edible City Solutions for social resilient and sustainably productive cities	Edible catalogue	https://www.edicitnet.com/fr/	A catalogue to collect and showcase edible NBS worldwide		0	1	1	0	0	0	0	0	0	0	1	1	1	0	0	1	1	1	1	0	0	0	1	0	1	1	1	1	1	1	1	1	0	0	Under construction		Scores related to ECS addressing Urban Challenges		yes	assess the ecological, socio-cultural and economic effects of nature-based solutions in cities and enable decision-makers to evaluate the contribution that NBS can make to achieving urban sustainability goals
farmAR	Farming software by creating4D	farmAR app	http://www.create4d.com/	farmAR ​app ​brings information about soil and crops ​health ​directly to the smartphone. ​All you need is to sign up with an email address and create a farm by drawing a polygon on the map. Your will immediately see the vegetation health map on your smartphone.	beril@create4d.com	1	1	1	0	0	0	0	0	0	0	1	0	0	0	0	0	1	0	0	0	0	0	1	0	0	0	1	0	0	0	0	0	0	0	1	API could be available (they ask for some budget to do so)	NDVI; NDWI; Irrigation needs, Yield prediction		Maybe
METEORA	Hydroponics and sustainable crops on rooftops of buildings in the city	Meteora app	https://www.projectdiva.eu/diva-funded-projects-maturation/	App to monitorize yield requirements in aquaponics installations using sensors and/or open data.	arodriguez@nosolosoftware.es; abermudez@nosolosoftware.es	0	1	0	0	0	0	0	0	0	0	1	0	0	1	1	1	1	0	0	0	0	0	1	0	0	0	0	0	0	0	0	0	0	0	Under construction (looking for funding)		Yield requirements		No
Nature4Cities		NBenefit$	https://www.nature4cities.eu/post/nature4cities-tools-methods-and-guides-to-renature-cities	Decision Support System (DSS) to assess Costs & Benefits of NBS archetypes. The Cost and Benefits of NBS archetypes are previously assessed through a system dynamics model, and their results compiled to be used in the DSS	Javier BABÍ ALMENAR, javier.babialmenar@list.lu; Benedetto RUGANI, benedetto.rugani@list.lu	1	0	1	0	0	0	0	0	0	0	1	1	1	0	0	0	0	1	0	0	1	0	0	0	0	1	1	1	1	0	0	0	0	0	No (The tool will achieve TRL5 at the end of Nature4Cities. Moreover, the tool is developed by Javier Babi Almenar as the main element of his PhD thesis. So, there will be no option to release the tool before his PhD defense).		Economic valuation of ES		yes	Complement the design&plan tool
Nature4Cities	Nature4cities	Environmental assessment tool		Environmental assessment of NBS (urban metabolism and life cycle assessment)	ozge.yilmaz@ekodenge.com; Pyrène Larrey-Lassalle <plarreylassalle@nobatek.inef4.com>; cinar.uysal@ekodenge.com	1	1	1	0	1	0	0	0	0	1	0	1	1	0	0	0	0	0	0	0	0	0	1	0	0	0	1	1	1	0	0	0	0	0	Under construction		Life cycle assessment		yes	Complement the design&plan tool
Oppla	EU Repository of Nature-Based Solutions	Ask Oppla	https://oppla.eu/ask-oppla	Ask Oppla is crowd-sourced enquiry service. It’s designed to help you find the information you need about nature-based solutions. Answers are provided by members of the Oppla community.					Forum	1	1	1	1	1	0	0	0	0	0	0	0	0	1	1	0	0	1	0	0	0	0	0	1	1	1	0	0	0	0	1	https://oppla.eu/ask-oppla	0		Maybe	To disseminate our results
Oppla	EU Repository of Nature-Based Solutions	Oppla Supermarket	https://oppla.eu/marketplace	A knowledge supermarket where you can obtain guidance, software, data and other useful resources - as well as promote the outputs of your own project or network.					Repository	1	1	1	1	1	0	0	0	0	0	0	0	0	1	0	0	0	1	0	0	1	1	1												yes	To disseminate our tools and connection to the API
ThinkNature		NBS knowledge hub	https://platform.think-nature.eu/nbs-projects	A catalogue of NBS-related H2020 projects, Case Studies (powered by Oppla) and Resources		0	1	1	0	1	1	1	1	1	0	0	0	0	0	0	0	0	1	1	0	0	0	1	0	1	1	1	1	1	0	0	0	0	0	1	https://platform.think-nature.eu/nbs-knowledge-hub	Number of topics; institutions involved; funding		maybe
ThinkNature		Greentown	https://game.think-nature.eu/	An NBS scenario game to demonstrate the impact of choices and thereby the advantages of using NBS. In Greentown the user is a mayor, with all the power and responsibility that brings.			1	1		1						0	0	0	0	0	0	0	1	1	0	0	0	1	0		0	1	1	1	0	0	0	0	0	Only the GUI	https://game.think-nature.eu/	Scores related to NBS adressing Urban challenges		No
ThinkNature		ThinkNature Platform (and handbook)	https://platform.think-nature.eu/	A multi-stakeholder communication platform supporting the understanding and promotion of Nature based Solutions (NbS)													0	0	0	0	0	0	1	0	0	0	0	0	0	0	0	0	0	0	0	0	0	0	0	0				No	repostory of projects and case studies (partly pwerde by Oppla)
UNaLab	Urban Nature Labs	Tools for co-creation	https://unalab.enoll.org/	The UNaLab Toolkit collects all the instruments used throughout the UNaLab project in a user-friendly and widely applicable format for the co-creation, experimentation and demonstration of innovative solutions in a real-life urban environment	spela.zalokar@enoll.org (contacts passed through Laura Wewndling, Laura.Wendling@vtt.fi)	0	0	1	0	0	0	0	0	0	0	1	0	0	0	0	0	0	0	1	0	0	0	1	0	0	0	0	1	0	0	1	1	1	0	1	https://unalab.enoll.org/	0		Maybe	To prepare the WP4 workshops
UNaLab	Urban Nature Labs	NBS Simulation Visualization Tool	http://unalab.eng.it/CockpitSelection/	Tool to visualize the results of the Systemic DST	peter.roebeling@ua.pt and piersaverio.spinnato@eng.it (contacts passed through Laura Wewndling, Laura.Wendling@vtt.fi)	0	1	1		1	0	0	0	1	1	0	1	1	0	1	0	0	0	1	0	0	0	1	0	1	1	1	1	1	0	0	0	0	0	Partially open and only available for some locations	http://unalab.eng.it/CockpitSelection/			No
URBAG	Integrated System Analysis of Urban Vegetation and Agriculture	Framework for quantifying food-water-energy interactions	https://urbag.eu/		gara.villalba@uab.cat; urbag@uab.cat	1	0	0	0	1	0	0	0	0	1	0	0	0	0	0	0	1	0	0	0	0	0	1	0	0	0	1	0	0	0	0	0	0	0	Under construction		E&M flows; Urban food production;: urban food demand; space availability		Maybe	To complement design&plan tool
URBAG	Integrated System Analysis of Urban Vegetation and Agriculture	Spatially-temporally resolved framework for quantitative analysis and simulation of green infrastructures	https://urbag.eu/		gara.villalba@uab.cat; urbag@uab.cat	1	0	0	0	1	0	0	0	0	1	0	0	0	0	0	0	1	0	0	0	0	0	1	0	0	0	1	0	0	0	0	0	0	0	Under construction		Urban heat island; concentrations of CO, NO2, O3, PM10 and PM2.5, VOC and SO; CO2 GI uptake (through OCS simulations)		Maybe	To ask for models or indicators
URBAG	Integrated System Analysis of Urban Vegetation and Agriculture	Integrated assessment of green infrastructure analysis	https://urbag.eu/	The integrated assessment of green infrastructures will be performed for the two cities by using life cycle analysis and atmospheric modeling, and will incorporate social and policy implications.	gara.villalba@uab.cat; urbag@uab.cat	0	0	1	0	1	0	0	0	0	1	0	1	0	0	0	0	1	0	0	0	0	0	1	0	1	0	1	1	1	0	0	0	0	0	Under construction		Carbon footprint; life cycle analysis		Maybe	To ask for models or indicators
Urban green up	Urban green up	Urban GreenUP NBS Selection tool	https://www.urbangreenup.eu/ (https://www.urbangreenup.eu/resources/nbs-selection-tool/nbs-selection-tool.kl)	This tool will recommend NBS for your city, based on your challenges and the capabilities of your organisation; A free digital tool to help cities identify the best nature-based solutions to tackle environmental problems and become more resilient to climate change.	cyacoub@leitat.org	0		1	0	1	0	0	0	1	0	0	1	1	0	0	0	0	0	0	0	0	0	1	0	1	0	1	1 (only municipality)	1	1	0	0	1	0	1	https://www.urbangreenup.eu/kdocs/1973100/NBS_Selection_Tool_-_Urban_GreenUP.xlsx	Scores related to NBS addressing Urban challenges		Maybe	To complement design&plan tool
URBINAT	Urban inclusive and innovative nature	NBS Living Catalogue	https://urbinat.eu/	Discuss with communities which are the solutions available through the project and serve as a basis to inspire the development of new solutions during project implementation as well as feeding the observatory's knowledge sharing task	contact@urbinat.eu mathilde.marengo@iaac.net chiara.farinea@iaac.net raquel.villodres@iaac.net	0	0	1	0	1	1	1	0	1	0	0	1	1	0	0	0	1	1	1	0	0	0	1	0	1	1	1	1	1	1	0	0	0	0	Under construction		0		No
URBINAT	Urban inclusive and innovative nature	SuperBarrio	https://urbinat.eu/	Superbarrio uses gamification strategies to engage the citizens in the design of the public space. As an open-source online tool, Superbarrio widens the potential audience of participatory design processes, overcoming the limits of conventional methodologies.	chiara.farinea@iaac.net (additional contact Diego.Pajarito@iaac.net, attended Girona meeting)	0	1	0	0	1	0	0	0	1	1	0	1	1	0	1	0	0	0	1	0	0	1	1	0	1	1	1	1	0	0	1	1	1	0	Under construction		Under construction		Yes	For an open version of serious game
FoodMetRes	Food planning and innovation for sustainable metropolitan regions	Analysis, data collection	http://www.foodmetres.eu/ http://www.foodmetres-kp.eu) http://www.foodmetres.eu/deliverables/	Foodmeter knowlledge portal: Food planing tools: Metropolitan Economic Food Balance, Area profiles and scenario, urban food planner, Sustainable food impact assessment (methodology and case studies). Tools and methods described in D3.3 (http://www.foodmetres.eu/wp-content/uploads/2015/10/D3.3-Metropolitan-Footprint-Tools-FINAL.pdf)		0	0	0	Database and data analisys.Methodology for calculation of urban doof print	1		1			1	0	1					1				0	0	0	0	1	1	1	1	1	0	0	0	0	0	0				Yes	Similar to « The edible game» of EdiCitNet on a larger scale (involves all NBS)
proGIreg	productive Green Infrastructure for post-industrial urban regeneration	Implementation Plan	https://progireg.eu/	Provide a uniformed scheme to plan the realization and allow monitoring of every one of the 8 NBS considered	timpe@la.rwth-aachen.de chiara.baldacchini@cnr.it		0		guidelines for planing, implementing, monitoring and business models							1		1		1	1	1				0	0	0	0	1	1	1	0	1	1	1	0	0		0		0		maybe	Some NBS are related to urban farming/gardens and green roofs
Nature4Cities	NBS for re-naturing cities: knowledge diffusion and decision support platform through new collaborative models	Geocluster4NBS	https://www.nature4cities.eu	Build Knowledge on NBS. A database providing NBS pioneer case studies examples. Pre-selection tool (from the Urban Challenges to the NBS pioneer case studies). Replication tool https://geocluster4nbs.nature4cities-platform.eu/	Marjorie Musy <marjorie.musy@ec-nantes.fr> Anna PARABOSCHI <anna.paraboschi@rina.org>	0	0	1	0	0	0	1	0	0	1	0	1	1	1	1	0	0	1	0	0	0	0	1	0	1	1	1	1	1	1					1	https://geocluster4nbs.nature4cities-platform.eu/#/
Nature4Cities	NBS for re-naturing cities: knowledge diffusion and decision support platform through new collaborative models	SUA Tool	https://www.nature4cities.eu	The Urban Assessment module of the N4C Platform provides opportunity to create simple scenarios in order to see how the planned NBS will affect its surroundings. Beside the module, called Simplified Urban Assessment Tool (SUAT), there are 3 main subtools : GreenPass, Colouree, Expert Model Based Box	GreenPass : Green4Cities | Florian Kraus <florian.kraus@green4cities.com> Colouree : Nicola Pisani Colouree <n.pisani@colouree.com> EMB Box : Körmöndi Barnabás <b.kormondi@mut.hu>	1	1	1	0	1	0	0	0	1	1	0	1	1	0	0	0	1	0	0	0	1	0	1	0	1	1	1	1	1	0	0	0	0	0	Under construction
Nature4Cities	NBS for re-naturing cities: knowledge diffusion and decision support platform through new collaborative models	Implementation Model Preselector Tool	https://www.nature4cities.eu	A web tool that allows to define the most appropriate Implementation model (o combination of governance, financing and business model sheles) for your NBS project	Egusquiza Ortega, Aitziber <aitziber.egusquiza@tecnalia.com> Arana Bollar, Maider <maider.arana@tecnalia.com>		1	1		1				1		0	1	1										1		1	1		1	1
Nature4Cities	NBS for re-naturing cities: knowledge diffusion and decision support platform through new collaborative models	Nature4Cities Platform	https://nature4cities-platform.eu/	This platform offers an integration framework where several elements (existing and new tools/services) are deployed and interconnected to provide access to NBS knowledge, and to complete the NBS assessment process: NBS project creation, urban, socio-economic and environmental impact evaluation and final NBS project implementation, including tools to manage stakeholder's participation.	Susana Martín Toral <susmar@cartif.es>; 'Victor Ivan Serna' <vicser@cartif.es>	0	1	1	0										1	1		1		1						1	1	1	1					1		under construction
CityFood	Smart integrated multitrophic city food production systems –a water and energy saving approach for global urbanisation	CITYFOOD Aquaponics Knowledge Base (CFAKB)	https://www.cityfood-aquaponics.com/	The Knowledge Base is a repository for the research and work conducted by all members of the CITYFOOD project. It will generate the public-facing final product, in kind of a database-backed website, exhibiting academic and commercial knowledge about aquaponics for an international audience. It will act as a robust resource portal for researchers, aquaponic practitioners, community leaders, and th…	cityfood@igb-berlin.de g.baganz@igb-berlin.de	0	1	0	0	0	0	1	0	1	0	0	0	0	0	0	0	0	1	0	0	0	1	0	0	0	0	1	1	0	0	0	1	0	0	1	cfakb.igb-berlin.de; online planned in June 2020	no indicators used
Cost Action TU1201	Urban Allotment Gardens in European Cities	Research platform	https://www.cost.eu/actions/TU1201/	Comprehend and manage the Allotment Gardens (AG) and their relevance for sustainable development in Europe, and also their impacts from social, ecological and urban design perspective.	alisakorolova@gmail.com	0	0	1	0	1	1	1	0	1	0	0	1	1	1	0	0	1	1	1	0	0	0	1	0	1	1	1	1	0	0	1	1	1	0	1	https://books.google.fr/books?id=aRO4CwAAQBAJ&pg=PT26&lpg=PT26&dq=cost+action+tu1201+research+platform&source=bl&ots=6uyAyw3JML&sig=ACfU3U3CVC3s5F3jbeMJ4Sv90FcGYmHZgA&hl=en&sa=X&ved=2ahUKEwjWvfKSp5jpAhXtzIUKHfhEAcUQ6AEwAnoECAkQAQ#v=onepage&q&f=false	Comparative rating system (Honey bee activity, "Lnight" and "Lden" for environmental noise, Electrical Conductivity, SAR/ESP, pH6-7, Water infiltration rate, organic matter>3%..		yes	The 8 Business Models explain which values propositions can drive urban NBS Fundings
Geofood	Supply and smart integration into the energy system	Showcases and innovative concepts	https://geofoodproject.eu/	Provide innovative concepts illustrating how to increase the economic viability of joining geothermical heat infrastructure and circular food production systems	svinna@svinna.is	1	0	1	0	1	1	1	0	1	0	0	1	1	1	1	1	1	1	1	0	0	1	1	0	1	1	1	0	1	0	1	1	1	0	1	https://geothermalworkshop.com/wp-content/uploads/2018/12/abstracts-book.pdf	inflow of mass and energy, timing of make-up wells, estimated limit of sustainable energy production and total energy in the reservoir
Houseful	Houseful: Innovative circular solutions and services for new business oppor-tunities in the EU housing sector	Houseful service	https://houseful.eu/	Composed of 11 circular solutions co-created by stakeholders in current housing value chain, it aims at the circular management and efficient use of water, waste, energy and material resources for all stages of European Building's life-cycle	roman.grunner@alchemia-nova.net	0	1	0	0	1	1	1	0	0	1	-	1	1	1	1	1	1	1	1	0	0	1	0	0	1	1	1	1	1	1	1	1	0	0	1	https://houseful.eu/resources/	0
MADRE	Metropolitan agriculture for developing an innovative, sustainable and responsible economy (Interreg Med)	MADRE Best practice Catalogue and Practices database as part of Agri-MADRE digital platform (web)	https://oppla.eu/sites/default/files/uploads/madrebestpracticecatalogue.pdf	Present cases studies on urban agriculture, with a short legalframework, budget overview and qualitative assessement (3 levels) along 8 challenges. Case studies are classified along innovation related to: farming, social, consumer, research, territorial, transnational. Interactive web DB with best practices from Albania, France, Spain, Greece, Italy. Also includes video interviews, jobs created, …	Manon DIENY m.dieny@avitem.org	0	1	0	DB & pdf catalogue	1	1		1	1			0	0	0	0	0	0	1	0	0	0	0	1	0	1	1	1	0	1	0	0	0	0	0	1	https://agri-madre.net/projects/	jobs created, area cultivated	https://goo.gl/tRPQUc	1	identification of contacts for EdiCitnet Catalogue
MADRE	Metropolitan agriculture for developing an innovative, sustainable and responsible economy (Interreg Med)	Resource Library as part of Agri-MADRE digital platform (web)	https://agri-madre.net/resources/	Library of report produced by MADRE in several langauges as well as local and EU report or legislation (no search criteria)	Manon DIENY m.dieny@avitem.org	0	1	0	0	0	0	0	0	0	0	1	0	0	0	0	0	0	1	0	0	0	0	1	0	0	0	0	0	0	0	0	0	0	0	1	https://agri-madre.net/resources/	0			book on NBS and urban agriculture
MADRE	Metropolitan agriculture for developing an innovative, sustainable and responsible economy (Interreg Med)	Interactive stakeholder map as part of Agri-MADRE digital platform (web)	https://agri-madre.net/	Allow the selection of stakeholders by type of organisation (business, academia, civil society, public authorities) and filed of activity (production, Distribution, Research, Public policy, Social, training). It only provides a description, contact, with links relevant projects when existing. Possibility to register new stakeholders. No statistics	Manon DIENY m.dieny@avitem.org	0	1	0	A joint transational network of stakeholders	0	0	0	0	0	0	1	0	0	0	0	0	0	1	1	0	0	1	1	based on Google Map	1	1	1	1	1	1	0	0	0	0	1	https://agri-madre.net/	0		1	identification of contacts for EdiCitnet Catalogue
Naturvation	Taking action for urban nature	Business Model Catalogue for Urban NBS	https://naturvation.eu/businessmodels	Business models (report) with introduction by video	(h.s.toxopeus@uu.nl)	1	0	0	0	0	1	1	0	1	0	0	1	1	0	0	1	1	1	1	0	0	1	0	0	1	1	1	1	1	1	0	0	0	0	1	https://naturvation.eu/businessmodels	0	https://drive.google.com/file/d/1V2iZmGiUG2QqvVhTqNLe_9VauMXXEw2H/view	YES	Urban application of aquaponic systems related to urban agriculture
Naturvation	Taking action for urban nature	Urban Nature Atlas	https://naturvation.eu/	develop the understanding on NBS in cities	Ed.Dammers@pbl.nl filka.sekulova@uab.cat francesc.baro@uab.cat lcampos@ent.cat PinterL@ceu.edu Almassy_Dora@phd.ceu.edu	0	0	1	0	0	1	1	0	1	0	0	1	1	0	0	0	0	1	1	0	0	1	0	0	1	1	1	1	1	1	1	1	0	0	1	https://naturvation.eu/atlas	0		Maybe
Naturvation	Taking action for urban nature	The urban nature navigator	https://naturvation-navigator.com/	assess the ecological, socio-cultural and economic effects of nature-based solutions in cities	Ed.Dammers@pbl.nl	0	1	1	0	1	1	1	0	1	0	0	1	1	0	1	1	1	1	1	0	0	1	1	0	1	1	1	1	1	1	1	1	0	0	Under construction - will be operational in september 2020				Maybe	Map the urban food system sustainability innovation, innovation impact pathways.
Naturvation	Taking action for urban nature	Mooc	https://naturvation.eu/learn/mooc	potential of nature-based solutions to help respond to climate change and sustainability challenges. New governance arrangements, business models, financing and forms of citizen engagement	pinterl@ceu.edu	1	0	1	0														1	1	training				Coursera	1	1	1	0					1		under construction (will be available in september)				Maybe
PARCEL	Pour une Alimentation Résiliente Citoyenne Et Locale	parcel tool (A web application)	http://www.parcel-app.org/	Evaluate for a given territory the agricultural land needed to feed itself locally, as well as the agricultural jobs and the ecological impacts associated with possible changes in agricultural production methods and/or diets (greenhouse gas emissions, pollution of water resources, effects on biodiversity...).The tool Offers to estimate the effects of certain changes in our diet : proximity betwee…	contact@parcel-app.org	1	1	1	0	1	1	1	1	0	1	0	1	1	0	0	1	1	1	1	0	0	1	0	0	1	1	1	1	1	1	1	1	0	0	1	http://www.parcel-app.org/assets/pdf/BASIC_Parcel-Note-methodologique_Octobre-2019.pdf	Crop Yield indicator, Surface, employment rate, Spatial Footprint Indicator Species destruction and soil poverty indicator, Imported deforestation
SESAME	Supporting entrepreneurship and agricultural know-how in European cities	Online toolkit	https://sesameproject.com/	Designing and testing training courses for these two targets: modules on entrepreneurship for students in agricultural high schools on the one hand, and "micro-learning" courses to raise awareness among spatial planning managers on the other		0	0	0	Training courses	1	0	0	0	1	0	0	0	0	0	0	0	0	1	1	0	0	1	0	0	1	0	0	1	1	1	1	0	1	0	1	https://sesameproject.com/online-toolkit/	0
URBAL	Urban-Driven Innovations For Sustainable Food Systems, case studies but no tools	Holistic methodology	https://www.urbalfood.org/	Map all dimensions of urban food system sustainability innovation that gives managers and policy-makers a common overview and methodology pf innovation impact pathways	info@urbalfood.org	0	0	1	0	1	0	0	0	1	0	0	1	1	0	0	0	0	1	1	0	0	0	1	0	1	1	1	1	1	1	1	1	0	0	1	https://www.urbalfood.org/the-project/	0
Les Pariculteurs		Toolkit: UA technical guide	http://www.parisculteurs.paris/fr/a-propos/	Ressource and guidance on the practical implementation of a city planning concept (100 ha initative for building-integrated green & UA (rooftops)). A techinical guide to setting up rooftop farms is available in French. It is detailed and was prepared for an architectural competition.	Perrine Boiton (Press officer) presse@paris.fr	0	0	1		1	0	0	0	1	1		1	1	1	0	0	0	1	1		0	0	0	0	1	1	1	1	1	0	1	1	1		y	http://www.parisculteurs.paris/fr/	0	Informative about roof top UA	1	Many examples, several underway.
Carrot City	Designing for Urban Agriculture	UA typologies	https://www.ryerson.ca/carrotcity/index.html	Extensive, visually-strong collection with case study focus. Actual projects and design studies. International database with many case studies of active or theoretical projects. Currently not being actively updated. In the past, international exhibitions were curated using cases studies from the website.	Joe Nasr	0	0	0	Case study format, inherently supports decision making.	1	1	1	1	1	1		1	1	0	0	0	0	1	1		0	0	0	0	1	1	1	1	1	0	0	0	0		y	https://www.ryerson.ca/carrotcity/index.html	0		1	Many examples, several underway.
Sustainable Food Places Network		Toolkit: ECS	https://www.sustainablefoodplaces.org/	Comprehensive open-source resource with evidence for citizens and city-level action. UA a small part.	info@sustainablefoodplaces.org	0	0	1	Excellent evidence base for projects that have succeeded	1	1			1	1		1	1	1	1	0	1	1	1	extreemly robust evidence base, led by experienced practicioners and activists	0	1			1	1	1	1	1	1	1	1	1		y	https://www.sustainablefoodplaces.org/get_involved/become_a_member/	1		A comprehensive set of decision making tools available, based on practical experience.	Based on many years experience and an awareness of what leads to success, and the needs of different stakeholders.
Farming Concrete	The Farming Concrete Data Collection Toolkit	Toolkit: Data registrator (incl. yield)	https://farmingconcrete.org/	The yield data of 430 community gardens in different formats with their totals calculated	To get involved or for technical assistance: Sheryll Durant, sheryll@farmingconcrete.org / General info & media inquiries: gardens@farmingconcrete.org / Project Director: Mara Gittleman, mara@farmingconcrete.org / Web Developer: Eric Brelsford, eric@farmingconcrete.org	1	1	1		1					1		1	0	1	1	1	1	1	0		0	1	0				1	1	1	0	1	1	1		y	https://farmingconcrete.org/barn/	1		User led data base recording crop yields from UA initiatives in NYC	One of the few active projects quantifying crop yields from community led UA initiatives
Platform Productive Urban Green	Community Gardening	Community garden typologies / Toolkit: Data registrator	https://www.berlin.de/gemeinschaftsgaertnern/	Local authority hosted database on community gardens, linked to indivdual gardens' websites	Katrin Bohn	0	1	0		1				1									1		A data based of community gardening initaives in Berlin, hosted by the city and populated by users	0	0	0		1		1	1	1		1	1			1	https://www.berlin.de/gemeinschaftsgaertnern/	0		User led data base of community ECS initiatives	Documents community food growing ECSs in Berlin
COST Action Urban Agriculture Europe		UA typologies / repository of strategies and literature	http://www.urban-agriculture-europe.org/resource-center/cost-uae-downloads.html https://www.cost.eu/actions/TD1106/	The book really brings the COST ACTION network together. The focus is on the urban design integration of UA at a range of scales.	n.a.	0	0	1	Guide to design strategies	0	0	1		1	0		1	1	0	0	0	0	0	1		1	1	0	A book can be purchased, also material avaialble on the website	1	1	1	1	1	0	0	0	0		1	http://www.urban-agriculture-europe.org/resource-center/cost-uae-downloads.html and for the book: https://www.jovis.de/en/books/product/urban-agriculture-europe.html	0	The web site includes references to many academic publications produced during the Cost Action.	A comprehensive overview of UA as an ECS	EU and UA focus.
UrbAct II	Sustainable Food in Urban Communities	Toolkit: participation	http://www.sustainable-everyday-project.net/urbact-sustainable-food/?p=6	A downloadable handbook: "Creating space for sustainable food systems in urban communities – Practical approaches and examples for cities". The handbook really brings the network together and shows what food-focused initiatives can achieve.	n.a.	0	0	1				1		1			1	1	1	0	0	0	1	1		0	1	0		1	0	1	1	1	1	1	1	1		1	http://www.sustainable-everyday-project.net/urbact-sustainable-food/?p=898	0		practical resource for establishing ECSs	EU and ECS focus.
SHARECITY	Sustainability of city-based food sharing	Toolkit: impact	https://sharecity.ie/	Extensive and well-structured database linked to individual food sharing projects, many including UA. Has toolkit for building impact reports and a databasee of 100 food share projects.	Log on via the web site. Also: sharecity@tcd.ie	0	1	1					1	1	1		1	1	1	1	1	1	1	1		0	1	0		1	1	1	1	1	1	1	1	1		1	https://shareit.sharecity.ie/toolshed	1	Comprehensive guide to preparing impact reports in the "tool-shed" section of the website.	Food sharing as an ECS and good guides for impact reporting	EU project with international focus. Good examples of impact assessment and data sharing.
Red de Ciudades por la Agroecología		Spanish repository of national resources on food	https://www.ciudadesagroecologicas.eu/	Open source network of food-active cities with a strong link to a significant national social network. "We have created a network of face-to-face and virtual exchange of experiences, knowledge, data, information and projects around the local agri-food systems of local Spanish entities, as well as the visibility of food policies that are being developed with an agroecological approach, political a…	red@ciudadesagroecologicas.eu Secretaría Técnica de la Red Estatal de la Ciudades por la Agroecología, Arzobispo José Delicado 1, 47014 Valladolid	0	0	1	access to many different reports and guides	0	1	0	0	1	0		1	1	1	1	0	0	1	1		0	1	0		1	1	1	1	1	1	1	1	1		1	The web site has many different access points to data.	0	Comprehensive support tool for Spanish Agro-Ecological initiatives.	Comprehensive set of tools and guides for establishing Agro ecological ECSs.	Agro Ecological approach to ECSs and several Spanish guides and tools.
CPUL repository	Continuous Productive Urban Landscape (CPUL)	repository: evidence, knowledge	no direct website	A chronological database of references to case studies, mainly in the form of publictions + websites	Katrin Bohn	0	0	1	Chronological review of UA / ECS resources up to 2014	0	0	0	1	1	1		1	1	1	0	0	1	0	1		1	0	0	Published in a book.	1	1	1	1	1	0	1	1	0		1	https://www.routledge.com/Second-Nature-Urban-Agriculture-Designing-Productive-Cities-1st-Edition/Viljoen-Bohn/p/book/9780415540582	0		Comprehensive review of strategies for integrating UA into cities.	Sets UA in a wide urban design context with strategies for its long term integration into cities.

## Sheet: Available Tools
											Output indicators
Name of the organisation in charge of the primary assessment	Organisation in charge of detailed assessment	Project title	Tool's name	Website	Description of the tool	Indicators used	Comments	Geographical coverage	Language	Support documents	Yield	Irrigation need	area cultivated	jobs created	ecological impact	urban heat	air quality	flooding	gentrification	NBS properness score	add column for new indicators	integrated aqua-agriculture (IAAC) KEY INDICATORS	volume of fish production	number of plants produced	energy production	Social inclusion	Organisational benefits	Landfill waste produced	Compost production	Rainwater harvesting	Health impact	market sales	Food donated	Total indicators	Model-based tools	Urban agriculture	NBS only	Info-based tools
ICRA	ICRA	Carrot City	UA typologies	https://www.ryerson.ca/carrotcity/index.html	Extensive, visually-strong collection with case study focus. Actual projects and design studies. International database with many case studies of active or theoretical projects. Currently not being actively updated. In the past, international exhibitions were curated using cases studies from the website.	0	It's a catalogue of projects and cases of urban agriculture.	Worlwide	EN																									0	0	1		1
ICRA	ICRA	CityFood	CITYFOOD Aquaponics Knowledge Base (CFAKB)	https://www.cityfood-aquaponics.com/	The Knowledge Base is a repository for the research and work conducted by all members of the CITYFOOD project. It will generate the public-facing final product, in kind of a database-backed website, exhibiting academic and commercial knowledge about aquaponics for an international audience. It will act as a robust resource portal for researchers, aquaponic practitioners, community leaders, and th…	this tool is one among the 6 tools that the project offers, a page of the living labs shows the results achieved with the surface and the fish production/ plants produced within.	CityFood will bring together the international and interdisciplinary skills of urban planners, farmers, researchers, entrepreneurs, community leaders and engaged citizens to build robust networks between stakeholders with the goal of developing and disseminating information about IAAC (Integrated aqua-agriculture).	BR, DE, NO (expected to have an international coverage)	EN	CityFood projet poster and cityfood speed presentation, cityfood living labs presentation, many publications of meetings,workshop, tours. No tool yet available online, publications on https://www.researchgate.net/project/CITYFOOD	1		1									1	1	1										5	0	1	0	1
ICRA	ICRA	Cost Action TU1201	Research platform	https://www.cost.eu/actions/TU1201/	Comprehend and manage the Allotment Gardens (AG) and their relevance for sustainable development in Europe, and also their impacts from social, ecological and urban design perspective.	no "indicators used" the main outputs will be the development of a comparative rating system and the formulation of new policies and guidelines to deal with AG under a typology of cases in European cities	The Action will provide a knowledge platform for an interdisciplinary team of experts in urban development (urban designers, social scientists, landscape architects, geographers,...) to constitute a Network System where knowledge and different aspects of urban AG across Europe can be shared and new policy analysis and planning strategies can be co-produced by the network.	EU	EN	Action fact sheet Memorandum of Understanding Annual Progress Conference Report Progress Report															1									1	0	1	0	1
ICRA	ICRA	COST Action Urban Agriculture Europe	UA typologies / repository of strategies and literature	http://www.urban-agriculture-europe.org/resource-center/cost-uae-downloads.html	The book really brings the COST ACTION network together. The focus is on the urban design integration of UA at a range of scales.		0																											0	0	1		1
ICRA	ICRA	CPUL repository	repository: evidence, knowledge	no direct website	A chronological database of references to case studies, mainly in the form of publictions + websites	0																												0	0	1		1
ICRA	ICRA	farmAR	farmAR app	http://www.create4d.com/	farmAR ​app ​brings information about soil and crops ​health ​directly to the smartphone. ​All you need is to sign up with an email address and create a farm by drawing a polygon on the map. Your will immediately see the vegetation health map on your smartphone.	NDVI; NDWI; Irrigation needs, Yield prediction		Worldwide	EN		1	1	1											1										4	1	1	0	0
Natasha	UL	Farming Concrete	Toolkit: Data registrator (incl. yield)	https://farmingconcrete.org/	The yield data of 430 community gardens in different formats with their totals calculated	The toolkit includes a total of 20 methods organized into five cathegories: food production data, environmental data, social data, health data and economic data. There is no direct indicator estimation but only a good dataset to estimate them.	Created by and for urban farmers and gardeners. The Toolkit helps tracking farms' and gardens' outputs to showcase the benefits, to improve and share practices, and to raise awareness of the impacts to funders and policymakers. The value of the Toolkit is thorough guidelines (including worksheets) for organized data collection. Users can create a profile for collecting and sharing data. There is …	US, with some cases around the world	EN	https://farmingconcrete.org/barn/static/resources/DataCollectionToolkit.pdf and instructional videos: https://farmingconcrete.org/toolkit/	1		1											1		1		1	1	1	1	1	1	10	1	1	0	0
SEMIDE	SEMIDE	Geofood	Showcases and innovative concepts	https://geofoodproject.eu/	Provide innovative concepts illustrating how to increase the economic viability of joining geothermical heat infrastructure and circular food production systems	inflow of mass and energy, timing of make-up wells, estimated limit of sustainable energy production and total energy in the reservoir	The GEOFOOD project showcases the opportunities of direct use of geothermal energy to increase food production in highly productive circular systems by Generating predictive models to design thermal treatment trains based on circular food production systems to maximize heat extraction from geothermal heat installations. The thermal treatment trains’ main outputs will be vegetables, fish, fertiliz…	Any	EN	Direct use of geothermal resources for circular food production (Thorarinsdottir & Unnthorsson) GeoFood: An example of circular economy by using geothermal heat, RAS and horticulture to produce fish and vegetables															1									1	1	1	0	0
SEMIDE	SEMIDE	Houseful	Houseful service	https://houseful.eu/	Composed of 11 circular solutions co-created by stakeholders in current housing value chain, it aims at the circular management and efficient use of water, waste, energy and material resources for all stages of European Building's life-cycle	17 KPI were identified : Primary Energy consumption reduction percentage after retrofitting (country specific), End Energy Bill Reduction Percentage, Renewable Energy Ratio, Waste disposed, Products' (level 1) Degree of Cyclability, Circular Inventory of Active Cycling, Design for Disassembly, GHG emissions payback time, Use of toxic materials, Indoor discomfort, Payback Period, Operation Expendi…		EU	EN, ES, DE	Reference methodologies and KPIs in circular economy analysis Social engagement strategy for the co-creation of HOUSEFUL solutions as new services and many other deliverables																								0	0	0	1	1
SEMIDE	SEMIDE	Les Pariculteurs	Toolkit: UA technical guide	http://www.parisculteurs.paris/fr/a-propos/	Ressource and guidance on the practical implementation of a city planning concept (100 ha initative for building-integrated green & UA (rooftops)). A techinical guide to setting up rooftop farms is available in French. It is detailed and was prepared for an architectural competition.		It's a catalogue of ECS in Paris with a map access	Paris	FR	Toolbox guidance document (French only): https://www.parisculteurs.paris/assets/boite_a_outils.pdf																								0	0	1		1
SEMIDE	SEMIDE	MADRE	Interactive stakeholder map as part of Agri-MADRE digital platform (web)	https://agri-madre.net/	Allow the selection of stakeholders by type of organisation (business, academia, civil society, public authorities) and filed of activity (production, Distribution, Research, Public policy, Social, training). It only provides a description, contact, with links relevant projects when existing. Possibility to register new stakeholders. No statistics	0	It allows the user to have results ofthe relevant existing projects according to 2 main stakeholders criterias : type of organisation and the field of activity	6 cities of the Mediterranean Area : Barcelona, Aix-marseille Provence, Montpellier, Bologna, Thessaloniki, Tirana	EN, FR, IT, GR, AL, CAT																									0	0	1		1
SEMIDE	SEMIDE	MADRE	MADRE Best practice Catalogue and Practices database as part of Agri-MADRE digital platform (web)	https://oppla.eu/sites/default/files/uploads/madrebestpracticecatalogue.pdf	Present cases studies on urban agriculture, with a short legalframework, budget overview and qualitative assessement (3 levels) along 8 challenges. Case studies are classified along innovation related to: farming, social, consumer, research, territorial, transnational. Interactive web DB with best practices from Albania, France, Spain, Greece, Italy. Also includes video interviews, jobs created, …	jobs created, area cultivated		6 cities of the Mediterranean Area : Barcelona, Aix-marseille Provence, Montpellier, Bologna, Thessaloniki, Tirana	EN				1	1	1											1	1							5	0	1	0	1
SEMIDE	SEMIDE	MADRE	Resource Library as part of Agri-MADRE digital platform (web)	https://agri-madre.net/resources/	Library of report produced by MADRE in several langauges as well as local and EU report or legislation (no search criteria)	0	his platform, based on the MADRE project, aims to connect the actors involved in metropolitan agriculture and food systems in the Mediterranean	6 cities of the Mediterranean Area : Barcelona, Aix-marseille Provence, Montpellier, Bologna, Thessaloniki, Tirana	EN, ES, FR, IT, EL, CA, SQ,	reports https://agri-madre.net/resources/	1			1																				2	0	1	0	1
SEMIDE	SEMIDE	Nature4Cities	Geocluster4NBS	https://geocluster4nbs.nature4cities-platform.eu/	Build Knowledge on NBS. A database providing NBS pioneer case studies examples. Pre-selection tool (from the Urban Challenges to the NBS pioneer case studies). Replication tool. Identify geographical areas where you can replicate a NBS that you have already demonstrated. Or search for solutions that you can import from geographical areas with similar urban context with regard to NBS implementatio…		The user can select /search for projects and NBS according to selected urban-challenge, sub-urban challenge and scale. The results are present on a map with short abstracts of each NBS site. For each NBS a factsheet is availabe. Replicability is not working yet.	NA	EN	factsheets on NBS https://geocluster4nbs.nature4cities-platform.eu/#/nbs			1	1												1								3	0	0	1	1
SEMIDE	SEMIDE	Naturvation	Business Model Catalogue for Urban NBS	https://naturvation.eu/	Business models	0	8 business models were identified, and 2 examples per business model were included in the Business model catalohue. The 8 types are : Risk reduction model, Green densification model, Local stewardship model, Green health model, Urban offsetting model, Vacant space model, Education model and Green heritage model. These models often need to be combined to provide enough funding to realize and maint…	ANY	EN	Business model catalogue (https://naturvation.eu/sites/default/files/results/content/files/business_model_catalogue.pdf), Business model puzzle (https://naturvation.eu/sites/default/files/results/content/files/nbs_business_model_puzzle_download.pdf), Business model displays (https://naturvation.eu/sites/default/files/results/content/files/nbs_business_model_puzzle_download.pdf)																								0	0	0	1	1
SEMIDE	SEMIDE	Naturvation	Urban Nature Atlas	https://naturvation.eu/	develop the understanding on NBS in cities	The advanced research (for relevant projects that matches the user's interests on the map) contains the following criterias : Country, city, starting year, challenges addressed, urban setting, project cost, initiating organization, management set-up, type of financing sources, monitoring process in place, citizens involved in monitoring	The urban nature Altlas contains 1000 examples of NBS from across 100 European cities, a map is at the disposal of the user, who can do either a quick research by icon or choose to make an advanced research by integrating some more detailed information (project cost, country…) in order to identify the relevant projects that fit his interests.	EU	EN	An interactive map, a methodology approach, A DATABASE OF NATURE-BASED SOLUTIONS ACROSS 100 EUROPEAN CITIES (https://naturvation.eu/sites/default/files/result/files/urban_nature_atlas_a_database_of_nature-based_solutions_across_100_european_cities.pdf)																								0	0	0	1	1
SEMIDE	SEMIDE	Oppla	Ask Oppla	https://oppla.eu/ask-oppla	Ask Oppla is crowd-sourced enquiry service. It’s designed to help you find the information you need about nature-based solutions. Answers are provided by members of the Oppla community.	0	It's a forum.	Worldwide	EN		0	0	0	0	0																			0	0		1	1
SEMIDE	SEMIDE	PARCEL	parcel tool (A web application)	http://www.parcel-app.org/	Evaluate for a given territory the agricultural land needed to feed itself locally, as well as the agricultural jobs and the ecological impacts associated with possible changes in agricultural production methods and/or diets (greenhouse gas emissions, pollution of water resources, effects on biodiversity...).The tool Offers to estimate the effects of certain changes in our diet : proximity betwee…	Crop Yield indicator, Surface, employment rate, Spatial Footprint Indicator Species destruction and soil poverty indicator, Imported deforestation	A web application available for a direct use with instant results, very user friendly, targets anyone interested in answering one of the 2 available questions in the French context: 1. What are the effects of a more local and sustainable agriculture? 2. How many people can we nourish with a farm plot? This tool makes it possible to estimate the surface needed to ensure a relocation of the food, a…	FR	FR	Methodology note (http://www.parcel-app.org/assets/pdf/BASIC_Parcel-Note-methodologique_Octobre-2019.pdf) and Contextualization of the results (http://www.parcel-app.org/assets/pdf/Parcel-Resultats-nationaux_Octobre-2019.pdf)	1	0	1	1	1																			4	1	1	0	0
SEMIDE	SEMIDE	Platform Productive Urban Green	Community garden typologies / Toolkit: Data registrator	https://www.berlin.de/gemeinschaftsgaertnern/	Local authority hosted database on community gardens, linked to indivdual gardens' websites	0																												0	0	1		1
UoB	ICRA	Red de Ciudades por la Agroecología		Spanish repository of national resources on food	https://www.ciudadesagroecologicas.eu/	Open source network of food-active cities with a strong link to a significant national social network. "We have created a network of face-to-face and virtual exchange of experiences, knowledge, data, information and projects around the local agri-food systems of local Spanish entities, as well as the visibility of food policies that are being developed with an agroecological approach, political a…	It seems like a network of more general information	ES	ES																									0	0	1		1
UoB	ICRA	SESAME	Online toolkit	https://sesameproject.com/	Designing and testing training courses for these two targets: modules on entrepreneurship for students in agricultural high schools on the one hand, and "micro-learning" courses to raise awareness among spatial planning managers on the other	0	SESAME aims at tackling problems like school dropouts, youth unemployment and the growing need for support from young entrepreneurs by accelerating their social inclusion and enabling them to use their full potential on their way to the labour market. SESAME provides many useful support documents for social entrepreneurs and their mentors.	NL, ES, LT, UK, FI, TR, UN (but aims to spread in the EU)	EN	Report on social entrepreneurship and monitoring, training social entreprise, Mentor method social entreprise, online toolkit for young social entrepreneurs and their mentors, manual for vet institutions on how to stimulate social entrepreneurship, one-stop shops in NL, LT, UK, ES, TR and FI																								0	0	1		1
UoB	ICRA	SHARECITY	Toolkit: impact	https://sharecity.ie/	Extensive and well-structured database linked to individual food sharing projects, many including UA. Has toolkit for building impact reports and a databasee of 100 food share projects.	1																												0	0	1		1
UoB	UL	Sustainable Food Places Network	Toolkit: ECS	https://www.sustainablefoodplaces.org/	Comprehensive open-source resource with evidence for citizens and city-level action. UA a small part.		It's a catalogue of workshop techniques to enhance urban food production and consumption	UK	EN	https://www.sustainablefoodplaces.org/resources/																								0	0	1		1
UoB	UL	ThinkNature	NBS knowledge hub	https://platform.think-nature.eu/nbs-projects	A catalogue of NBS-related H2020 projects, Case Studies (powered by Oppla) and Resources	Number of topics; institutions involved; funding	It's a catalogue of NBS information (projects, resources, case studies...)	Worldwide	EN		0	0	0	0	0																			0	0		1	1
UoB	UL	UNaLab	NBS Simulation Visualization Tool	http://unalab.eng.it/NbsSvt/	Tool to visualize the results of the Systemic DST	urban heat, air quality, flooding, gentrification	Link updated. On 29/7 it's not working. The input data is based on workshops with stakeholders.	Eindhoven, Genova, Tampere		https://unalab.eu/system/files/2020-02/d42-nbs-impact-simulator-and-monitor-2020-02-17.pdf						1	1	1	1															4	1	0	1	0
UoB	UL	UNaLab	Tools for co-creation	https://unalab.enoll.org/	The UNaLab Toolkit collects all the instruments used throughout the UNaLab project in a user-friendly and widely applicable format for the co-creation, experimentation and demonstration of innovative solutions in a real-life urban environment	0	It's a catalogue of workshop techniques with filters to choose the rigth one.	NA	EN		0	0	0	0	0																			0	0		1	1
UoB	UL	UrbAct II	Toolkit: participation	http://www.sustainable-everyday-project.net/urbact-sustainable-food/?p=6	A downloadable handbook: "Creating space for sustainable food systems in urban communities – Practical approaches and examples for cities". The handbook really brings the network together and shows what food-focused initiatives can achieve.	0		EU	EN	http://www.sustainable-everyday-project.net/urbact-sustainable-food/?page_id=5830																								0	0	1		1
UoB	UL	URBAL	Holistic methodology	https://www.urbalfood.org/	Map all dimensions of urban food system sustainability innovation that gives managers and policy-makers a common overview and methodology pf innovation impact pathways	The central considerations to the research are the sustainability dimensions: environment, socio-culture, food security, nutrition and governance	The project develops a holistic methodology that serves as a decision-making tool for practioners and policymakers by mapping the impact pathways that go from urban innovations to all dimensions of sustainability of food systems. The methodology aims to descrive how innovations take place in terms of knowledge and material flows, networks, challenges and opportunities.	ANY	EN	Scientific papers, conference papers, reports, policy brief, videos and other documents https://www.urbalfood.org/resources/																								0	0	1		1
UoB	UL	Urban green up	Urban GreenUP NBS Selection tool	https://www.urbangreenup.eu/resources/nbs-selection-tool/nbs-selection-tool.kl	This tool will recommend NBS for your city, based on your challenges and the capabilities of your organisation; A free digital tool to help cities identify the best nature-based solutions to tackle environmental problems and become more resilient to climate change.	Scores related to NBS addressing Urban challenges	It's an excel tool to choose the most proper NBS based on urban challenges, policies and organization skills.	Worldwide	EN											1														1	1	0	1	0
																																			6	20	9	23
																																			Model-based tools	ECS	NBS only	Info-based tools

## Sheet: Model-based Tools
									One line by output produced
Project title	Tool's name	Website	Description of the tool	Indicators used	Comments	Geographical coverage	Language	Support documents	Type of calculation (ex-ante or ex-post)	Output produced (name of the indicator with units)	Inputs required for producing the output	List of external data used	Calculation method provided (Y/N)	If yes, provide a link	Is it transferable or context specific?	Comments
farmAR	farmAR app	http://www.create4d.com/	farmAR ​app ​brings information about soil and crops ​health ​directly to the smartphone. ​All you need is to sign up with an email address and create a farm by drawing a polygon on the map. Your will immediately see the vegetation health map on your smartphone.	NDVI; NDWI; Irrigation needs, Yield prediction	supports yield production, chemicals doses, irrigastion needs, soils and diseases (plant heatlh) based on satellite data	Worldwide	English	FarmAR, a farmer's augmented reality application based on semantic web. 10.23919/SEEDA-CECNSM.2017.8088230	NA	NDVI, NDWI (no units - normalized indices)	Login with an email and create a farm (outlining in a map), then satellite observations (GEO tags) will be visualised; for creating own GEO tags, picture and notes (lat-long, altitude automatic)	up-to date Sallelite (Copernicus) data observations	N? (double check publication)		Transferable	The aim of farmAR is to bring information about land and crops directly to the farmer’s mobile phone; a part from visualising satellite GEO tags, users can create their own Tags; information is shared with all farmers using same fields
UNaLab	Tools for co-creation	https://unalab.enoll.org/	The UNaLab Toolkit collects all the instruments used throughout the UNaLab project in a user-friendly and widely applicable format for the co-creation, experimentation and demonstration of innovative solutions in a real-life urban environment	0	It's a catalogue of workshop techniques with filters to choose the rigth one.	NA	English		NA	NA	NA	NA	NA	NA	NA
UNaLab	NBS Simulation Visualization Tool	http://unalab.eng.it/NbsSvt/	Tool to visualize the results of the Systemic DST		Link updated. On 29/7 it's not working. The input data is based on workshops with stakeholders.	Eindhoven, Genova, Tampere		https://unalab.eu/system/files/2020-02/d42-nbs-impact-simulator-and-monitor-2020-02-17.pdf	ex-ante	Heat and air pollution: Pollutant concentrations; Daily meteorogical variable	Data from stakeholders (not specified)	Anthropogenic emissions (EMEP inventory); biogenic emissions (MEGAN model), initial and boundary conditions (MOZART model); orography; land use.	Not directly but they can be found	https://ruc.noaa.gov/wrf/wrf-chem/	Context specific	Not working
UNaLab	NBS Simulation Visualization Tool	http://unalab.eng.it/NbsSvt/	Tool to visualize the results of the Systemic DST		Link updated. On 29/7 it's not working. The input data is based on workshops with stakeholders.	Eindhoven, Genova, Tampere		https://unalab.eu/system/files/2020-02/d42-nbs-impact-simulator-and-monitor-2020-02-17.pdf	ex-ante	Flooding: Depth of water, velocity	Data from stakeholders: Historical precipitations; historical flood events; urban geometry, physical urban characteristics, man-made systems for water conveyance; natural streams and water bodies and existing NBS solutions		Y	https://unalab.eu/system/files/2020-02/d42-nbs-impact-simulator-and-monitor-2020-02-17.pdf (p. 27)	Context specific	Not available yet
UNaLab	NBS Simulation Visualization Tool	http://unalab.eng.it/NbsSvt/	Tool to visualize the results of the Systemic DST		Link updated. On 29/7 it's not working. The input data is based on workshops with stakeholders.	Eindhoven, Genova, Tampere		https://unalab.eu/system/files/2020-02/d42-nbs-impact-simulator-and-monitor-2020-02-17.pdf	ex-ante	Sprawl, gentrification, land use and real estate valuation: land use, population, housing quantity, development density, living space and real estate value.	Data from stakeholders.	Land use; road network; environmental amenities; urban centres, population densities; household types; property value; transport cost and construction cost	Y	https://unalab.eu/system/files/2020-02/d42-nbs-impact-simulator-and-monitor-2020-02-17.pdf (p. 28)	Context specific	Not working
Urban green up	Urban GreenUP NBS Selection tool	https://www.urbangreenup.eu/resources/nbs-selection-tool/nbs-selection-tool.kl	This tool will recommend NBS for your city, based on your challenges and the capabilities of your organisation; A free digital tool to help cities identify the best nature-based solutions to tackle environmental problems and become more resilient to climate change.	Scores related to NBS addressing Urban challenges	It's an excel tool to choose the most proper NBS based on urban challenges, policies and organization skills.	Worldwide	English		ex-ante	Success factors to implement NBS (scores 0-10)	Urban challenges to address; NBs already considered; organization information	Values of an external panel.	Y	In the same excel	Transferable	Qualitative inputs and outputs
Urban green up	Urban GreenUP NBS Selection tool	https://www.urbangreenup.eu/resources/nbs-selection-tool/nbs-selection-tool.kl	This tool will recommend NBS for your city, based on your challenges and the capabilities of your organisation; A free digital tool to help cities identify the best nature-based solutions to tackle environmental problems and become more resilient to climate change.	Scores related to NBS addressing Urban challenges	It's an excel tool to choose the most proper NBS based on urban challenges, policies and organization skills.	Worldwide	English		ex-ante	NBS recommendations (scores 0-100)	Urban challenges to address; NBs already considered; organization information	Values of an external panel.	Y	In the same excel	Transferable	Qualitative inputs and outputs
Urban green up	Urban GreenUP NBS Selection tool	https://www.urbangreenup.eu/resources/nbs-selection-tool/nbs-selection-tool.kl	This tool will recommend NBS for your city, based on your challenges and the capabilities of your organisation; A free digital tool to help cities identify the best nature-based solutions to tackle environmental problems and become more resilient to climate change.	Scores related to NBS addressing Urban challenges	It's an excel tool to choose the most proper NBS based on urban challenges, policies and organization skills.	Worldwide	English		ex-ante	Performance of all NBS addressing the selected urban challenges (score 0-100)	Urban challenges to address; NBs already considered; organization information	Values of an external panel.	Y	In the same excel	Transferable	Qualitative inputs and outputs
Urban green up	Urban GreenUP NBS Selection tool	https://www.urbangreenup.eu/resources/nbs-selection-tool/nbs-selection-tool.kl	This tool will recommend NBS for your city, based on your challenges and the capabilities of your organisation; A free digital tool to help cities identify the best nature-based solutions to tackle environmental problems and become more resilient to climate change.	Scores related to NBS addressing Urban challenges	It's an excel tool to choose the most proper NBS based on urban challenges, policies and organization skills.	Worldwide	English		ex-ante	Difficulty score (1-10) and possible barriers for all NBS	Urban challenges to address; NBs already considered; organization information	Values of an external panel.	Y	In the same excel	Transferable	Qualitative inputs and outputs
CityFood	CITYFOOD Aquaponics Knowledge Base (CFAKB)	https://www.cityfood-aquaponics.com/	The Knowledge Base is a repository for the research and work conducted by all members of the CITYFOOD project. It will generate the public-facing final product, in kind of a database-backed website, exhibiting academic and commercial knowledge about aquaponics for an international audience. It will act as a robust resource portal for researchers, aquaponic practitioners, community leaders, and th…	this tool is one among the 6 tools that the project offers, a page of the living labs shows the results achieved with the surface and the fish production/ plants produced within.	CityFood will bring together the international and interdisciplinary skills of urban planners, farmers, researchers, entrepreneurs, community leaders and engaged citizens to build robust networks between stakeholders with the goal of developing and disseminating information about IAAC (Integrated aqua-agriculture).	BR, DE, NO (expected to have an international coverage)	EN	CityFood projet poster and cityfood speed presentation, cityfood living labs presentation, many publications of meetings,workshop, tours. No tool yet available online, publications on https://www.researchgate.net/project/CITYFOOD	ex post	academic and commercial knowledge about aquaponics for an international audience			N		transferable
Cost Action TU1201	Research platform	https://www.cost.eu/actions/TU1201/	Comprehend and manage the Allotment Gardens (AG) and their relevance for sustainable development in Europe, and also their impacts from social, ecological and urban design perspective.	no "indicators used" the main outputs will be the development of a comparative rating system and the formulation of new policies and guidelines to deal with AG under a typology of cases in European cities	The Action will provide a knowledge platform for an interdisciplinary team of experts in urban development (urban designers, social scientists, landscape architects, geographers,...) to constitute a Network System where knowledge and different aspects of urban AG across Europe can be shared and new policy analysis and planning strategies can be co-produced by the network.	EU	EN	Action fact sheet Memorandum of Understanding Annual Progress Conference Report Progress Report	ex-ante	- Case study reports - Policy oriented guidelines and recommendations - AG Comparative rating system - Training courses - Good practices examples - Workshops	NA	NA	N		transferable
Geofood	Showcases and innovative concepts	https://geofoodproject.eu/	Provide innovative concepts illustrating how to increase the economic viability of joining geothermical heat infrastructure and circular food production systems	inflow of mass and energy, timing of make-up wells, estimated limit of sustainable energy production and total energy in the reservoir	The GEOFOOD project showcases the opportunities of direct use of geothermal energy to increase food production in highly productive circular systems by Generating predictive models to design thermal treatment trains based on circular food production systems to maximize heat extraction from geothermal heat installations. The thermal treatment trains’ main outputs will be vegetables, fish, fertiliz…	Any	EN	Direct use of geothermal resources for circular food production (Thorarinsdottir & Unnthorsson) GeoFood: An example of circular economy by using geothermal heat, RAS and horticulture to produce fish and vegetables	post ante	Tool not available for the public predictive models to design thermal treatment trains based on circular food production systems to maximize heat extraction from geothermal heat installations.	NA	NA	N		transferable
MADRE	MADRE Best practice Catalogue and Practices database as part of Agri-MADRE digital platform (web)	https://oppla.eu/sites/default/files/uploads/madrebestpracticecatalogue.pdf	Present cases studies on urban agriculture, with a short legalframework, budget overview and qualitative assessement (3 levels) along 8 challenges. Case studies are classified along innovation related to: farming, social, consumer, research, territorial, transnational. Interactive web DB with best practices from Albania, France, Spain, Greece, Italy. Also includes video interviews, jobs created, …	jobs created, area cultivated		6 cities of the Mediterranean Area : Barcelona, Aix-marseille Provence, Montpellier, Bologna, Thessaloniki, Tirana	EN		ex-post	Static (paper) catalogue:∙ . Mapping the key stakeholders of urban and peri-urban agriculture and connecting them at the Mediterranean level; ∙ Identifying the good practices developed and consolidating the knowledge gained; ∙ Evaluating the economic, environmental and social performance factors of urban and peri-urban agriculture; ∙ Promoting the most relevant and innovative practices and facili…	NA	NA			transferable
MADRE	Resource Library as part of Agri-MADRE digital platform (web)	https://agri-madre.net/resources/	Library of report produced by MADRE in several langauges as well as local and EU report or legislation (no search criteria)	0	his platform, based on the MADRE project, aims to connect the actors involved in metropolitan agriculture and food systems in the Mediterranean	6 cities of the Mediterranean Area : Barcelona, Aix-marseille Provence, Montpellier, Bologna, Thessaloniki, Tirana	EN, ES, FR, IT, EL, CA, SQ,	reports https://agri-madre.net/resources/	0	Reports, white papers,catalogues, articles, business models, policy papers	NA	https://agri-madre.net/resources/	0	0	transferable
MADRE	Interactive stakeholder map as part of Agri-MADRE digital platform (web)	https://agri-madre.net/	Allow the selection of stakeholders by type of organisation (business, academia, civil society, public authorities) and filed of activity (production, Distribution, Research, Public policy, Social, training). It only provides a description, contact, with links relevant projects when existing. Possibility to register new stakeholders. No statistics	0	It allows the user to have results ofthe relevant existing projects according to 2 main stakeholders criterias : type of organisation and the field of activity	6 cities of the Mediterranean Area : Barcelona, Aix-marseille Provence, Montpellier, Bologna, Thessaloniki, Tirana	EN, FR, IT, GR, AL, CAT		ex-post	Relevant existing Projects description, localisation, field of activity and website	1. Type of stakeholder 2. Field of activity 3. Country	https://agri-madre.net/resources/	N		Transferable	This tool allows the user to discover new projects ans resources according to the 3 input criterias selected, meet actors in his field and get involved.
PARCEL	parcel tool (A web application)	http://www.parcel-app.org/	Evaluate for a given territory the agricultural land needed to feed itself locally, as well as the agricultural jobs and the ecological impacts associated with possible changes in agricultural production methods and/or diets (greenhouse gas emissions, pollution of water resources, effects on biodiversity...).The tool Offers to estimate the effects of certain changes in our diet : proximity betwee…	Crop Yield indicator, Surface, employment rate, Spatial Footprint Indicator Species destruction and soil poverty indicator, Imported deforestation	A web application available for a direct use with instant results, very user friendly, targets anyone interested in answering one of the 2 available questions in the French context: 1. What are the effects of a more local and sustainable agriculture? 2. How many people can we nourish with a farm plot? This tool makes it possible to estimate the surface needed to ensure a relocation of the food, a…	FR	FR	Methodology note (http://www.parcel-app.org/assets/pdf/BASIC_Parcel-Note-methodologique_Octobre-2019.pdf) and Contextualization of the results (http://www.parcel-app.org/assets/pdf/Parcel-Resultats-nationaux_Octobre-2019.pdf)	ex-ante	1. Agricultural area (needed to satisfy the demand) 2. Created jobs 3. Ecological impact	1. The concerned territory (commune, department...) 2. Population (number, composition,...) 3. Percentage of the relocated food (local production) 4. Population diet 5. Percentage of organic matter that conditions the yield used for the calculations	AGRESTE – Bilans d’approvisionnements, Statistique Agricole Annuelle, Recensement Agricole – Ministère de l’Agriculture et de l’Alimentation (moyenne des données 2014-2016) INSEE – Profils des habitants des communes françaises, Populations légales – Institut national de la statistique et des études économiques (données 2016) ANSES – Étude individuelle nationale des consommations alimentaires (INC…	Y	http://www.parcel-app.org/assets/pdf/BASIC_Parcel-Note-methodologique_Octobre-2019.pdf	Context specific (France)	The PARCEL tool was designed to complement agronomic expertise work on the agricultural production of a territory. PARCEL can be located upstream in order to set up food transition objectives discussed and shared with stakeholders in the territory.
Nature4Cities	Geocluster4NBS	https://geocluster4nbs.nature4cities-platform.eu/	Build Knowledge on NBS. A database providing NBS pioneer case studies examples. Pre-selection tool (from the Urban Challenges to the NBS pioneer case studies). Replication tool. Identify geographical areas where you can replicate a NBS that you have already demonstrated. Or search for solutions that you can import from geographical areas with similar urban context with regard to NBS implementatio…	Area cultivated (i.e. scale/area at which the NBS is implemented), jobs created (only indirectly, through the stakeholders involved), and social incusion (i.e. stakeholders involved)	The user can select /search for projects and NBS according to selected urban-challenge, sub-urban challenge and scale. The results are present on a map with short abstracts of each NBS site. For each NBS a factsheet is availabe. Replicability is not working yet (should be working for Milan, Ankara, Madrid and Sezged).	EU, with some cases around the world	English	factsheets on NBS https://geocluster4nbs.nature4cities-platform.eu/#/nbs	0	NBS factsheets with information on urban challenges that can be addressed, scale at which the NBS is implemented (e.g. in ha or m), social aspects (i.e. stakeholders involved), and economical aspects (range of costs, e.g. in EUR/m2/year).	NA	NA	N	NA	Transferable	This tool allows the user to review the NBS factsheets and the pioneer projects map (by using a pre-selection tool, based on selected urban challenge(s) & desired scale - either city, district or entity level).
Farming Concrete	Toolkit: Data registrator (incl. yield)	https://farmingconcrete.org/	The data collection tool of 437 community gardens in different formats with their totals calculated. The Toolkit includes a total of 18 methods organized into five cathegories: food production data, environmental data, social data, health data and economic data. There is no direct indicator estimation but only a good dataset to estimate them.	Crop yield and number of plants produced (i.e. harvest count), social inclusion (i.e. participation, changes in attitude), landfill waste diversion, compost production, rainwater harwesting, health impact, market sales, food donation	Created by and for urban farmers and gardeners. The Toolkit helps tracking farms' and gardens' outputs to showcase the benefits, to improve and share practices, and to raise awareness of the impacts to funders and policymakers. The value of the Toolkit is thorough guidelines (including worksheets) for organized data collection. Users can create a profile for collecting and sharing data. There is …	US, with some cases around the world	EN	https://farmingconcrete.org/barn/static/resources/DataCollectionToolkit.pdf and instructional videos: https://farmingconcrete.org/toolkit/	ex-post	For selected towns/gardens, the following outputs are produced (in table and graph format): crop count (number of plants), harvest count (in pounds), landfill waste diversion (in pounds or gallons), compost production (in pounds or gallons), rainwater harvesting (in gallons), participation (working hours), knowledge sharing (number of participants), changes in attitude (yum & yucks), good moods (…	Concrete gardens create a profile and upload the data collected according to the Farming concrete data collection toolkit. Many gardens report only part of data or just for some years.	NA	Y	Only summation of collected data	Transferable
